# Supplementary material for: Integrated population modelling reveals a perceived source to be a cryptic sink
Source: PubMed Central journal article supplement (PMC4785613; doi:10.1111/1365-2656.12481), 2016-02-08
Supplement: JANE-85-467-s001.pdf [file JANE-85-467-s001.pdf]

1 **Figure S1.** Immigration (a), emigration of geese aged 1 (b) and 2+ (c), survival of geese  
 2 aged 1 (d) and 2+ (e) and recruitment rate (f) against per capita rate of increase per  
 3 annum in population size (PCRI) of Greenland white-fronted geese at Wexford, 1983-  
 4 2010. Black dots show posterior means (with 95% CRI, grey lines). The posterior mode  
 5 of the correlation coefficients ( $r$  with 95% CRI) and probability of a positive correlation  
 6 ( $P(r) > 0$ ) are inset.

7

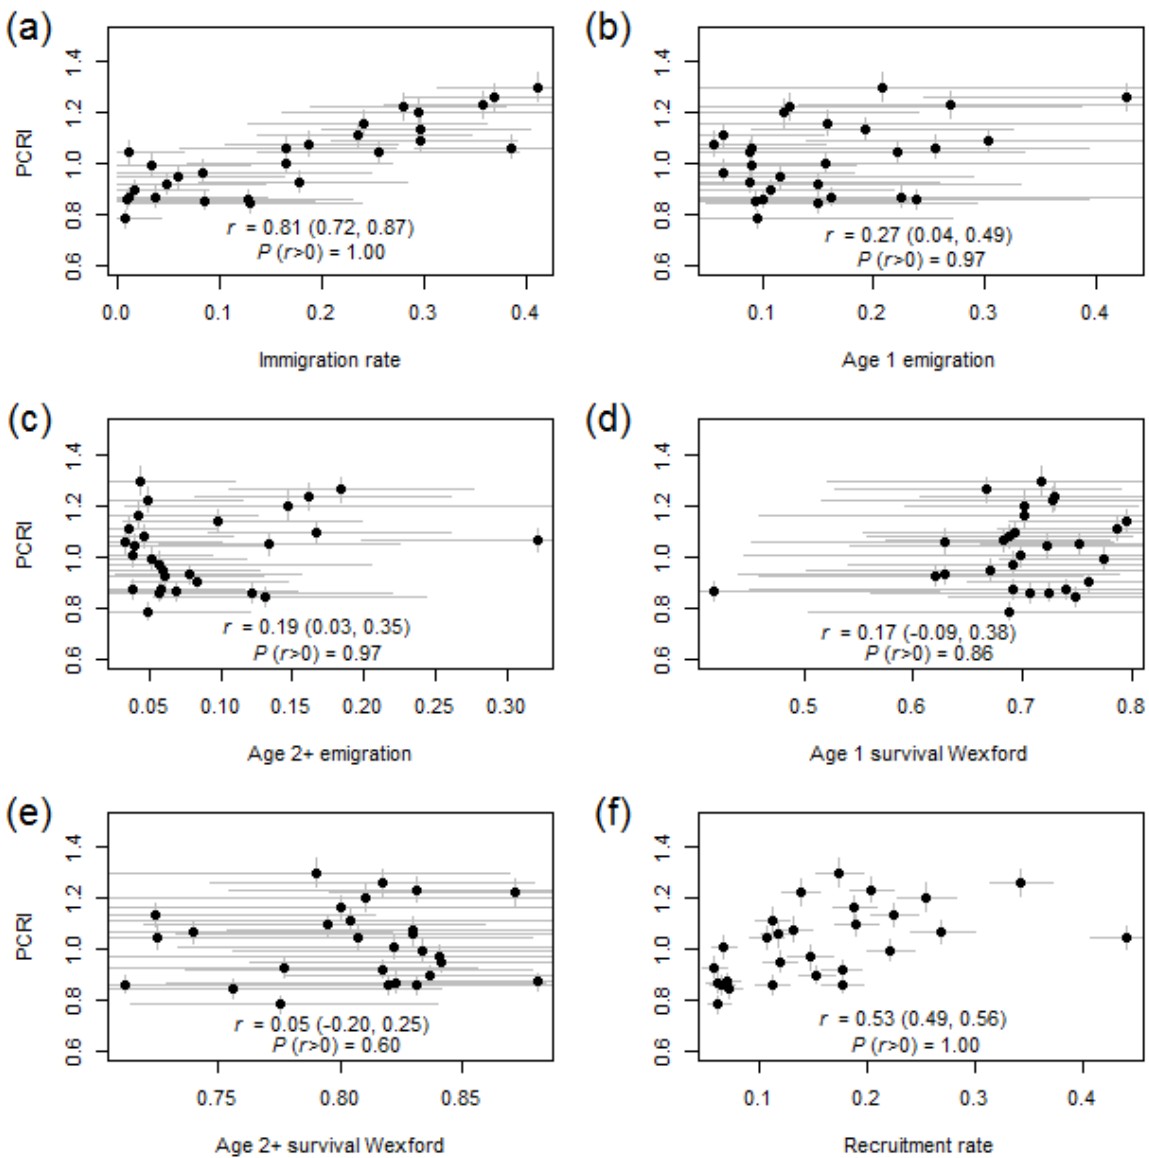

8
