# Supplementary material for: Integrated population modelling reveals a perceived source to be a cryptic sink
Source: PubMed Central journal article supplement (PMC4785613; doi:10.1111/1365-2656.12481), 2016-02-08
Supplement: JANE-85-467-s002.pdf [file JANE-85-467-s002.pdf]

1 **Figure S2.** Emigration against immigration rate (a-b) and emigration against recruitment  
2 rate (c-d) for birds aged 1 and 2+ in the Wexford subpopulation of Greenland white-  
3 fronted geese. For all figures, black dots show posterior means (with 95% CRI, grey  
4 lines). The posterior mode of the correlation coefficients ( $r$  with 95% CRI) and  
5 probability of a positive correlation ( $P(r) > 0$ ) are inset.  
6

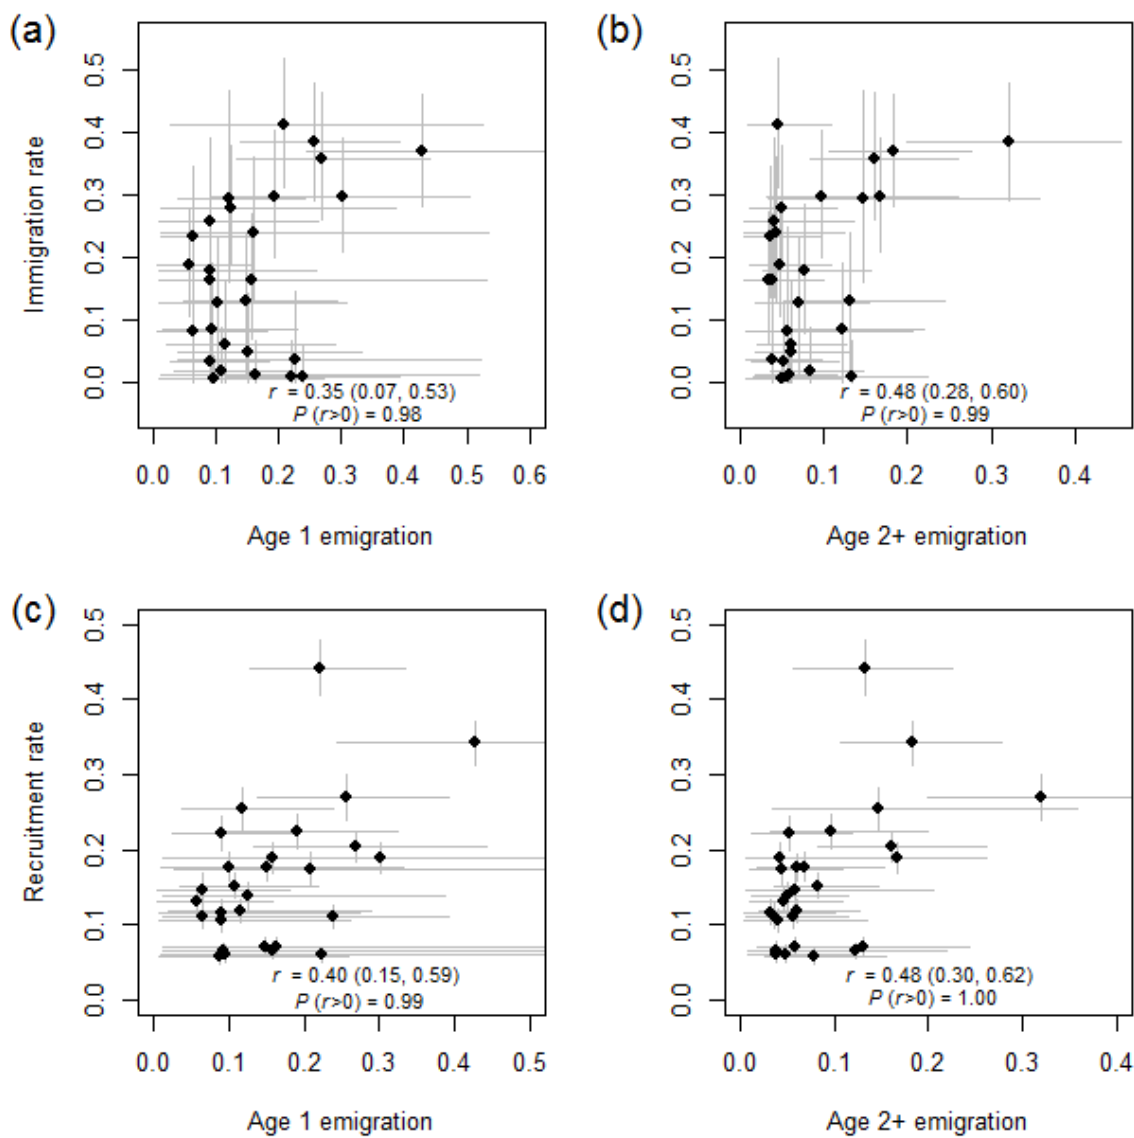

7
